# Supplementary material
Source: publisher figshare collection journal article supplement (https://acs.figshare.com/ndownloader/files/3981154)
Supplement: Supplementary file 1 [file 3981154]

# Facile preparation of paclitaxel loaded silk fibroin nanoparticles for enhanced antitumor efficacy by locoregional drug delivery

*Puyuan Wu<sup>a,‡</sup>, Qin Liu<sup>a,‡</sup>, Rutian Li<sup>a</sup>, Jing Wang<sup>b</sup>, Xu Zhen<sup>b</sup>, Guofeng Yue<sup>c</sup>, Huiyu Wang<sup>d</sup>, Fangbo Cui<sup>a</sup>, Fenglei Wu<sup>d</sup>, Mi Yang<sup>a</sup>, Xiaoping Qian<sup>a</sup>, Lixia Yu<sup>a</sup>, Xiqun Jiang<sup>b</sup>, Baorui Liu<sup>a,\*</sup>*

<sup>a</sup> The Comprehensive Cancer Centre of Drum Tower Hospital, Medical School of Nanjing University, Clinical Cancer Institute of Nanjing University, 321 Zhongshan Rd, Nanjing 210008, China

<sup>b</sup> Laboratory of Mesoscopic Chemistry and Department of Polymer Science, Engineering College of Chemistry & Chemical Engineering, Nanjing University, Nanjing 210093, China

<sup>c</sup> Nanjing Medical University, 140 Hanzhong Rd, Nanjing 210029, China

<sup>d</sup> The Comprehensive Cancer Center of Drum Tower Hospital Affiliated to Nanjing Medical University, 321 Zhongshan Rd, Nanjing 210008, China

Corresponding Author: \*E-mail: baorui.liu@nju.edu.cn

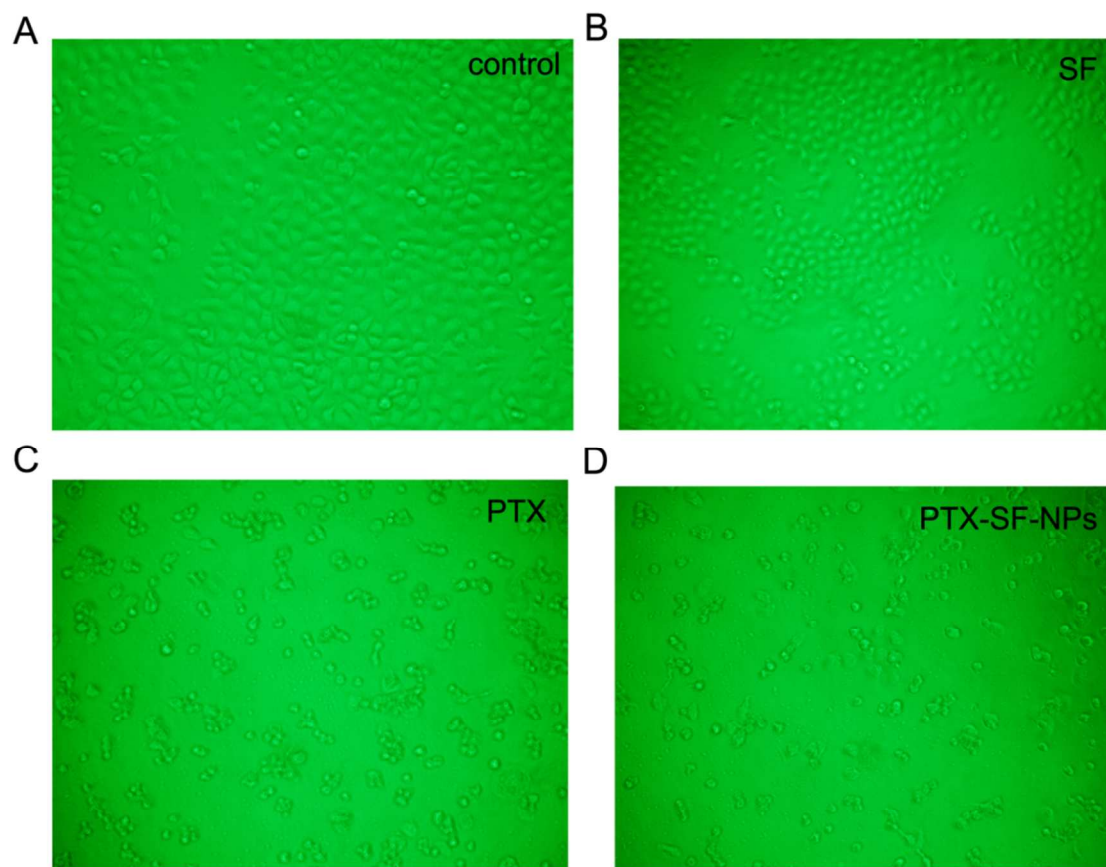

**Figure S1.** Morphological changes of BGC-823 after exposed to PTX and PTX-SF NPs at 6400ng/ml PTX for 48h. Cell remained normal morphology (A) in SF group (B). Cells turned round in PTX (C) and PTX-SF NPs (D) groups.

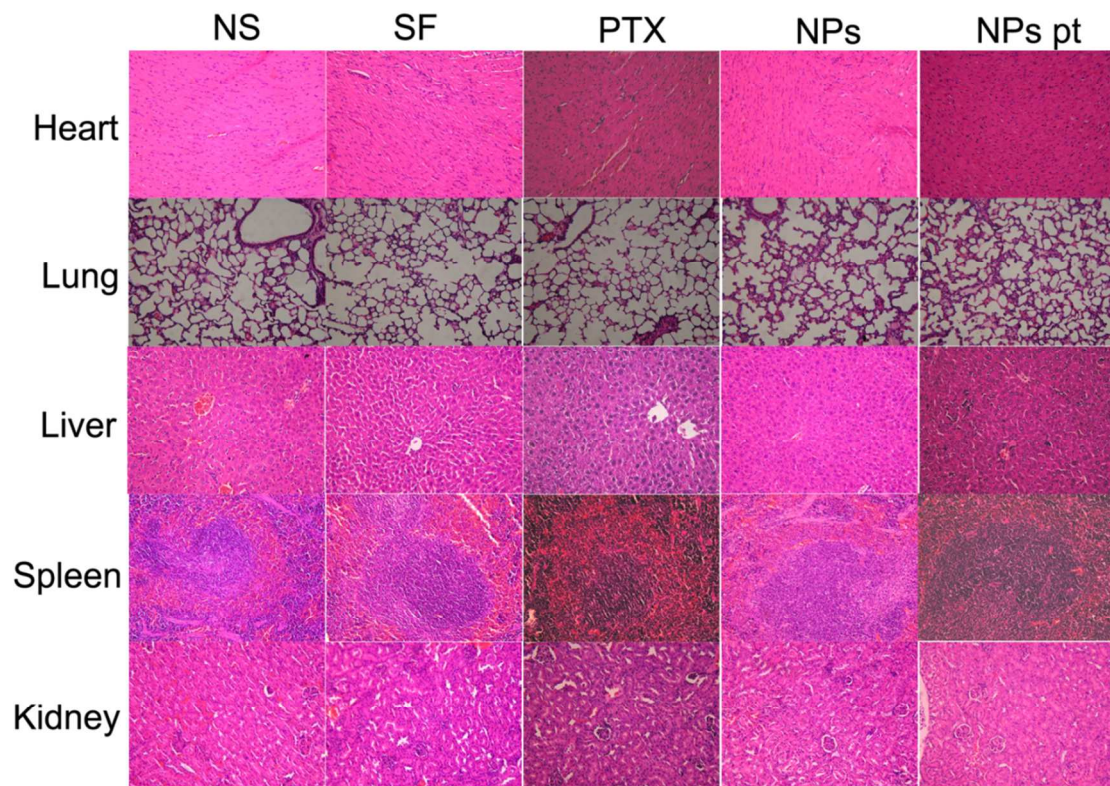

**Figure S2.** H&E staining of organs in each experimental group ( $\times 200$ ).
